# Supplementary material for: Positive Darwinian selection is a driving force for the diversification of terpenoid biosynthesis in the genus Oryza
Source: PubMed Central journal article supplement (PMC4172859; doi:10.1186/s12870-014-0239-x), 2014-09-16
Supplement: 12870_2014_239_MOESM1_ESM.pdf [file 12870_2014_239_MOESM1_ESM.pdf]

**Additional file 1. Accessions of seven *Oryza* species analyzed and the designation of the *OryzaTPS1s* genes.**

| Species                | Accession | Origin      | Gene designation |
|------------------------|-----------|-------------|------------------|
| <i>O. sativa</i>       | GSOR100   | Japan       | <i>OsTPS</i>     |
| <i>O. ruffipogon</i>   | PI 590418 | Myanmar     | <i>OrTPS1</i>    |
| <i>O. nivara</i>       | PI 590425 | Myanmar     | <i>OnTPS1</i>    |
| <i>O. barthii</i>      | PI 590400 | Philippines | <i>ObTPS1</i>    |
| <i>O. glaberrima</i>   | PI 432555 | Guinea      | <i>OgTPS1</i>    |
| <i>O. glumaepatula</i> | PI 527368 | Brazil      | <i>OgluTPS1</i>  |
| <i>O. officinalis</i>  | PI 590412 | Philippines | <i>OoTPS1</i>    |

Note: The second letter in the gene name is for the species name. For instance, for “*OnTPS1*”, “n” is for the species name “*O. nivara*”.
