# Supplementary material for: Positive Darwinian selection is a driving force for the diversification of terpenoid biosynthesis in the genus Oryza
Source: PubMed Central journal article supplement (PMC4172859; doi:10.1186/s12870-014-0239-x), 2014-09-16
Supplement: 12870_2014_239_MOESM2_ESM.pdf [file 12870_2014_239_MOESM2_ESM.pdf]

|          |                                                                                            |     |
|----------|--------------------------------------------------------------------------------------------|-----|
| OsTPS1   | MATSVPSVLLLLFPVPTCTDMLVSPVECGDLHCKPFPDHHPNVWGYFLTFSPCTFPSMLLMKRRKAHVSEEQVRRMILECSSGPNL     | 85  |
| OoTPS1   | MATSVPSVLLLLFPVPTCTDMLVSPVECGDLHCKPFPDHHPNVWGYFLTFSPCTFPSMLLMKRRKAHVSEEQVRRMILECSSGPNL     | 85  |
| OgTPS1   | MATSVPSVLLLLFPVPTCTDMLVSPVECGDLHCKPFPDHHPNVWGYFLTFSPCTFPSMLLMKRRKAHVSEEQVRRMILECSSGPNL     | 85  |
| OrTPS1   | MATSVPSVLLLLFPVPTCTDMLVSPVECGDLHCKPFPDHHPNVWGYFLTFSPCTFPSMLLMKRRKAHVSEEQVRRMILECSSGPNL     | 85  |
| ObTPS1   | MATSVPSVLLLLFPVPTCTDMLVSPVECGDLHCKPFPDHHPNVWGYFLTFSPCTFPSMLLMKRRKAHVSEEQVRRMILECSSGPNL     | 85  |
| OgluTPS1 | MATSVPSVLLLLFPVPTCTDMLVSPVECGDLHCKPFPDHHPNVWGYFLTFSPCTFPSMLLMKRRKAHVSEEQVRRMILECSSGPNL     | 85  |
| OnTPS1   | MATSVPSVLLLLFPVPTCTNMLVSPVERGDLHCKPFPDHHPNVWGYFLTFSPCTFPSMLLMKREAHVSEEQVRRMILECSSGPNL      | 85  |
| SbTPS4   | -----MAIEAKIQHQAOQIEDVHPK----FHSSLWGFDFLLHHVPCRFVQYLMKDKVEIMKEEVKKMLLDVDS--FDL             | 68  |
| ZmTPS23  | -----MAADEARSVSRHSEEDMHGK----HHSWLWGFDFLLHHVPCRFVQYLMKDNVEIMKEEVKKMLLDVGS--SDL             | 68  |
|          |                                                                                            |     |
| OsTPS1   | HVKLEIVDTLRLCIDYHYEKEIENVLRVVEEEDD--TDNHYDLHTTALRFYLLRKHGYVYASPDVFORFRDEEGNFTDNDNNNGT      | 169 |
| OoTPS1   | HVKLEIVDTLRLCIDYHYEKEIENVLRVVEEEDD--TDNHYDLHTTALRFYLLRKHGYVYASPDVFORFRDEEGNFTDNDNNNGT      | 169 |
| OgTPS1   | HVKLEIVDTLRLCIDYHYEKEIENVLRVVEEEDD--TDNHYDLHTTALRFYLLRKHGYVYASPDVFORFRDEEGNFTDNDNNNGT      | 169 |
| OrTPS1   | HVKLEIVDTLRLCIDYHYEKEIENVLRVVEEEDD--TDNHYDLHTTALRFYLLRKHGYVYASPDVFORFRDEEGNFTDNDNNNGT      | 169 |
| ObTPS1   | HVKLEIVDTLRLCIDYHYEKEIENVLRVVEEEDD--TDNHYDLHTTALRFYLLRKHGYVYASPDVFORFRDEEGNFTDNDNNNGT      | 169 |
| OgluTPS1 | HVKLEIVDTLRLCIDYHYEKEIENVLRVVEEEDD--TDNHYDLHTTALRFYLLRKHGYVYASPDVFORFRDEEGNFTDNDNNNGT      | 169 |
| OnTPS1   | HIKLEIVDTLRLCIDYHYEKEIENVLRVVEEEDDSDNICYDLHTTALRFYLLRKHGYVYASPDVFORFRDEEGNFTDNDNNNGT       | 170 |
| SbTPS4   | SDKLEICIDTLRLGLDYHYTKEDKLMCNTEFKASDQ----DLDLPTTSHLFYLLRKHGYVYHISDVFLKFRDDKGNIVTDD----A     | 145 |
| ZmTPS23  | SKKLDICIDTLRLGLDYHYTKEDKLMCNTEFKARQ----DLDLPTTSQLFYLLRKHGYVYHISDVFLKFRDDKGLIVTND----A      | 145 |
|          |                                                                                            |     |
| OsTPS1   | RSMLSLYNAHLRIHGEEILDDAIVFTRNYLQSVVKHLQSPMADEVCSALRTPLFRPRRVEARHYISVYDKLPTRNETILEFAK        | 254 |
| OoTPS1   | RSMLSLYNAHLRIHGEEILDDAIVFTRNYLQSVVKHLQSPMADEVCSALRTPLFRPRRVEARHYISVYDKLPTRNETILEFAK        | 254 |
| OgTPS1   | RSMLSLYNAHLRIHGEEILDDAIVFTRNYLQSVVKHLQSPMADEVCSALRTPLFRPRRVEARHYISVYDKLPTRNETILEFAK        | 254 |
| OrTPS1   | RSMLSLYNAHLRIHGEEILDDAIVFTRNYLQSVVKHLQSPMADEVCSALRTPLFRPRRVEARHYISVYDKLPTRNETILEFAK        | 254 |
| ObTPS1   | RSMLSLYNAHLRIHGEEILDDAIVFTRNYLQSVVKHLQSPMADEVCSALRTPLFRPRRVEARHYISVYDKLPTRNETILEFAK        | 254 |
| OgluTPS1 | RSMLSLYNAHLRIHGEEILDDAIVFTRNYLQSVVKHLQSPMADEVCSALRTPLFRPRRVEARHYISVYDKLPTRNETILEFAK        | 254 |
| OnTPS1   | RSMLSLYNAHLRIHGEEILDDAIVFTRNYLQSVVKHLQSPMTEDEVCSALRTPLFRPRRVEARHYISVYDKLPTRNETILEFAK       | 255 |
| SbTPS4   | RCLLIMYEAHLRVKGEIILDNLIIFTKSOLQCIIDDLEPQLKEEVKYALETPLFRRLKRVQTRQYISIEYKNTAHNMLLEFSK        | 230 |
| ZmTPS23  | RCLLRMYEAHVRVNGEEILDNLIIFTKRLOQCIIDDLEPTLQEVRYALETPLFRRLNRVQARCFISTYKSTTRINMLLEFSK         | 230 |
|          |                                                                                            |     |
| OsTPS1   | LDFGILQSLYCEELNILTMWVKELQLQDHIS--FARDRMVEMHFWMGLGVLFEPQYSYGRMLTKLIFVSIFFDDIYDNYSTLEESK     | 338 |
| OoTPS1   | LDFGILQSLYCEELNILTMWVKELQLQDHIS--FARDRMVEMHFWMGLGVLFEPQYSYGRMLTKLIFVSIFFDDIYDNYSTLEESK     | 338 |
| OgTPS1   | LDFGILQSLYCEELNILTMWVKELQLQDHIS--FARDRMVEMHFWMGLGVLFEPQYSYGRMLTKLIFVSIFFDDIYDNYSTLEESK     | 338 |
| OrTPS1   | LDFGILQSLYCEELNILTMWVKELQLQDHIS--FARDRMVEMHFWMGLGVLFEPQYSYGRMLTKLIFVSIFFDDIYDNYSTLEESK     | 338 |
| ObTPS1   | LDFGILQSLYCEELNILTMWVKELQLQDHIS--FARDRMVEMHFWMGLGVLFEPQYSYGRMLTKLIFVSIFFDDIYDNYSTLEESK     | 338 |
| OgluTPS1 | LDFGILQSLYCEELNILTMWVKELQLQDHIS--FARDRMVEMHFWMGLGVLFEPQYSYGRMLTKLIFVSIFFDDIYDNYSTLEESK     | 338 |
| OnTPS1   | LDFGILQSLYCEELNILTMWVKELQLQDHIS--FARDRMVEMHFWMGLGVLFEPQYSYGRMLTKLIFVSIFFDDIYDNYSTLEESK     | 339 |
| SbTPS4   | LDFNILLTLYCEELKDLTLWVTEFCQANTSIYARDRMVEMHFWMGVLFEPQYSYSRKMLTQLEFMIIVSILLDDLYDNHCTTEEGN     | 315 |
| ZmTPS23  | LDFNILLTLYCEELKDLTLWVTEFCACANTSIYARDRMVEMHFWMGVLFEPQYSYSRKMLTQLEFMIIVSVLDDLYDSHCTTEEGN     | 315 |
|          |                                                                                            |     |
| OsTPS1   | LFTEAERWDEEAAEELPGYMKFFYKVLITMKSIEIDLKIQGNKHVDYVKNLLIDATRIFYNEVKWRSEGADQVAATVBEHLKI        | 423 |
| OoTPS1   | LFTEAERWDEEAAEELPGYMKFFYKVLITMKSIEIDLKIQGNKHVDYVKNLLIDATRIFYNEVKWRSEGADQVAATVBEHLKI        | 423 |
| OgTPS1   | LFTEAERWDEEAAEELPGYMKFFYKVLITMKSIEIDLKIQGNKHVDYVKNLLIDATRIFYNEVKWRSEGADQVAATVBEHLKI        | 423 |
| OrTPS1   | LFTEAERWDEEAAEELPGYMKFFYKVLITMKSIEIDLKIQGNKHVDYVKNLLIDATRIFYNEVKWRSEGADQVAATVBEHLKI        | 423 |
| ObTPS1   | LFTEAERWDEEAAEELPGYMKFFYKVLITMKSIEIDLKIQGNKHVDYVKNLLIDATRIFYNEVKWRSEGADQVAATVBEHLKI        | 423 |
| OgluTPS1 | LFTEAERWDEEAAEELPGYMKFFYKVLITMKSIEIDLKIQGNKHVDYVKNLLIDATRIFYNEVKWRSEGADQVAATVBEHLKI        | 423 |
| OnTPS1   | LFTEAERWDEEAAEELPGYMKFFYKVLITIKSIEIDLKIQGNKHVDYVKNLLIDATRIFYNEVKWRSEGADQVAATVBEHLKI        | 424 |
| SbTPS4   | VFTAALERWDEEAVEQCPTYLRTLTVNLLTVKALTEWLNLNQNNKHAKIVKRLIIDMAKCYNAETEWDRK--KYVPAVDEHLKI       | 398 |
| ZmTPS23  | AFTAALQRWDEEGVQCPTYLRTLTVNIRATIKATEEDLNFNQNNKHAKIVKGLIIDMAMCYNAETEWDRK--KYVPAVDEHLKI       | 398 |
|          |                                                                                            |     |
| OsTPS1   | SVPSSCMHVPVYAFVAMGNDVTTDDAINWGMAYPKIITSSCIVGRLNDIASHEREQGSSSSSS--TVEACMREHGGITKEEAYA       | 508 |
| OoTPS1   | SVPSSCMHVPVYAFVAMGNDVTTDDAINWGMAYPKIITSSCIVGRLNDIASHEREQGSSSSSS--TVEACMREHGGITKEEAYA       | 507 |
| OgTPS1   | SVPSSCMHVPVYAFVAMGNDVTTDDAINWGMAYPKIITSSCIVGRLNDIASHEREQGSSSSSS--TVEACMREHGGITKEEAYA       | 507 |
| OrTPS1   | SVPSSCMHVPVYAFVAMGNDVTTDDAINWGMAYPKIITSSCIVGRLNDIASHEREQGSSSSSS--TVEACMREHGGITKEEAYA       | 507 |
| ObTPS1   | SVPSSCMHVPVYAFVAMGNDVTTDDAINWGMAYPKIITSSCIVGRLNDIASHEREQGSSSSSS--TVEACMREHGGITKEEAYA       | 507 |
| OgluTPS1 | SVPSSCMHVPVYAFVAMGNDVTTDDAINWGMAYPKIITSSCIVGRLNDIASHEREQGSSSSSS--TVEACMREHGGITKEEAYA       | 505 |
| OnTPS1   | SVPSSCMHVPVYAFVAMGNDVTTDDAINWGIAYPKIITSSCIVGRLNDIASHEREGSS--SS--TVEACMREHGGITKEEAYA        | 506 |
| SbTPS4   | SARSSGCMHIVSQGFISMG--DVATSEALKMASTYPKIIVAVCIITARLANDIMSYKRETSQNMVS--TVKTCAYBYG--TVAQAIE    | 480 |
| ZmTPS23  | SARSSGCMHIVSQGFISMG--DVATSEALEMASTYPKIIVRAVCIITARLANDIMSYKREASNNMTMVS--TVKTCAYBYGTTTVAQAIE | 481 |
|          |                                                                                            |     |
| OsTPS1   | KLRELVEESWMDIAGECLRPAQAQ--PPPLLEAVVNATRVLDVFKDDQDAYTHPSSLKDTIHSIYILSV--                    | 576 |
| OoTPS1   | KLRELVEESWMDIAGECLRPAQAQ--PPPLLEAVVNATRVLDVFKDDQDAYTHPSSLKDTIHSIYILSV--                    | 575 |
| OgTPS1   | KLRELVEESWMDIAGECLRPAQAQ--PPPLLEAVVNATRVLDVFKDDQDAYTHPSSLKDTIHSIYILSV--                    | 574 |
| OrTPS1   | KLRELVEESWMDIAGECLRPAQAQ--PPPLLEAVVNATRVLDVFKDDQDAYTHPSSLKDTIHSIYILSV--                    | 575 |
| ObTPS1   | KLRELVEESWMDIAGECLRPAQAQ--PPPLLEAVVNATRVLDVFLYKDDQDAYTHPSSLKDTIHSIYILSV--                  | 575 |
| OgluTPS1 | KLRELVEESWMDIAGECLRPAQAQAPPLLEAVVNATRVLDVFLYKDDQDAYTHPSSLKDTIHSIYILSV--                    | 574 |
| OnTPS1   | KLRELVEESWMDIAGECLRPAQAQAPPLLEAVVNATRVLDVFIYKDDQDAYTHPSSLKDTIHSIYILSV--                    | 575 |
| SbTPS4   | KLRELIEEAWMDITECLRQQPK---VLLERAVNLARTMDFLYKD--VDCYTDSTRSIRKIGILDSLYVDLIN                   | 546 |
| ZmTPS23  | KIRELIEEAWMDITECLRQPK---ALLERAVNLARTMDFLYKD--ADCYTDSTRSIRKIGILDSLYVHLID                    | 547 |

(Additional file 2. Amino acid sequence alignment of OryzaTPS1s, SbTPS4 and ZmTPS3.
