# Supplementary material for: Positive Darwinian selection is a driving force for the diversification of terpenoid biosynthesis in the genus Oryza
Source: PubMed Central journal article supplement (PMC4172859; doi:10.1186/s12870-014-0239-x), 2014-09-16
Supplement: 12870_2014_239_MOESM3_ESM.pdf [file 12870_2014_239_MOESM3_ESM.pdf]

**Additional file 3. Relative abundance of individual sesquiterpenes produced by *Oryza*TPS1s.**

| Category   | Genes                      | Germacrene D    | $\beta$ -elemene | ( <i>E</i> )- $\beta$ -caryophyllene | $\alpha$ -humulene |
|------------|----------------------------|-----------------|------------------|--------------------------------------|--------------------|
| <b>EGS</b> | <i>OsTPS1</i> <sup>a</sup> | ND <sup>b</sup> | 37.7 $\pm$ 1.1   | 57.1 $\pm$ 1.8                       | 5.2 $\pm$ 0.3      |
| <b>EGS</b> | <i>OoTPS1</i>              | ND              | 44.3 $\pm$ 1.4   | 50.3 $\pm$ 1.7                       | 5.4 $\pm$ 0.3      |
| <b>EGS</b> | <i>OgTPS1</i>              | ND              | 44.5 $\pm$ 0.8   | 49.4 $\pm$ 0.8                       | 6.1 $\pm$ 0.3      |
| <b>ECS</b> | <i>ObTPS1</i>              | ND              | 1.1 $\pm$ 0.1    | 96.6 $\pm$ 0.2                       | 2.3 $\pm$ 0.1      |
| <b>ECS</b> | <i>OnTPS1</i>              | 1.4 $\pm$ 0.1   | 2.5 $\pm$ 0.2    | 83.9 $\pm$ 1.0                       | 12.2 $\pm$ 0.8     |
| <b>ECS</b> | <i>OgluTPS1</i>            | ND              | 0.8 $\pm$ 0.1    | 96.1 $\pm$ 0.3                       | 3.1 $\pm$ 0.1      |
| <b>DAS</b> | <i>OrTPS1</i>              | 55.1 $\pm$ 0.8  | 30.5 $\pm$ 0.6   | 9.5 $\pm$ 0.3                        | 4.9 $\pm$ 0.1      |

<sup>a</sup> The total production of sesquiterpenes for each enzyme is set as 100%.

<sup>b</sup> ND: not detected.
