# Supplementary material for: Positive Darwinian selection is a driving force for the diversification of terpenoid biosynthesis in the genus Oryza
Source: PubMed Central journal article supplement (PMC4172859; doi:10.1186/s12870-014-0239-x), 2014-09-16
Supplement: 12870_2014_239_MOESM4_ESM.pdf [file 12870_2014_239_MOESM4_ESM.pdf]

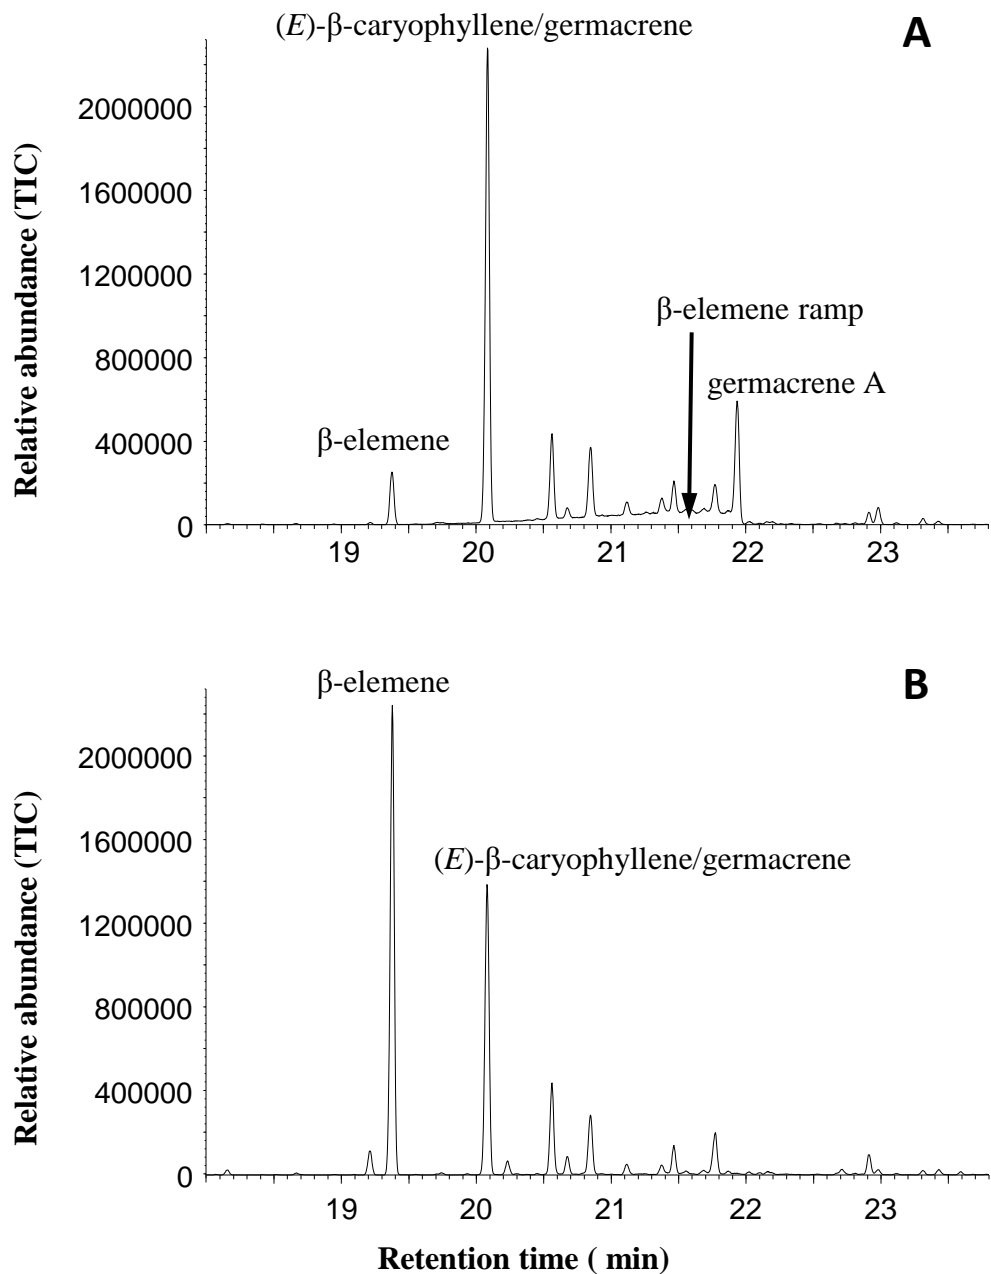

**Additional file 4.** Chemical conversion of the sesquiterpene germacrene A to  $\beta$ -elemene at typical GC injector temperatures. Chromatograms show the GC-MS analysis of terpene production for an (*E*)- $\beta$ -caryophyllene/germacrene A synthase (EGS) with the GC injector temperature at (A) an atypical lower setting, 150 °C or (B) 250 °C, the temperature setting usually employed for standard analysis.
