# Supplementary material for: Positive Darwinian selection is a driving force for the diversification of terpenoid biosynthesis in the genus Oryza
Source: PubMed Central journal article supplement (PMC4172859; doi:10.1186/s12870-014-0239-x), 2014-09-16
Supplement: 12870_2014_239_MOESM5_ESM.pdf [file 12870_2014_239_MOESM5_ESM.pdf]

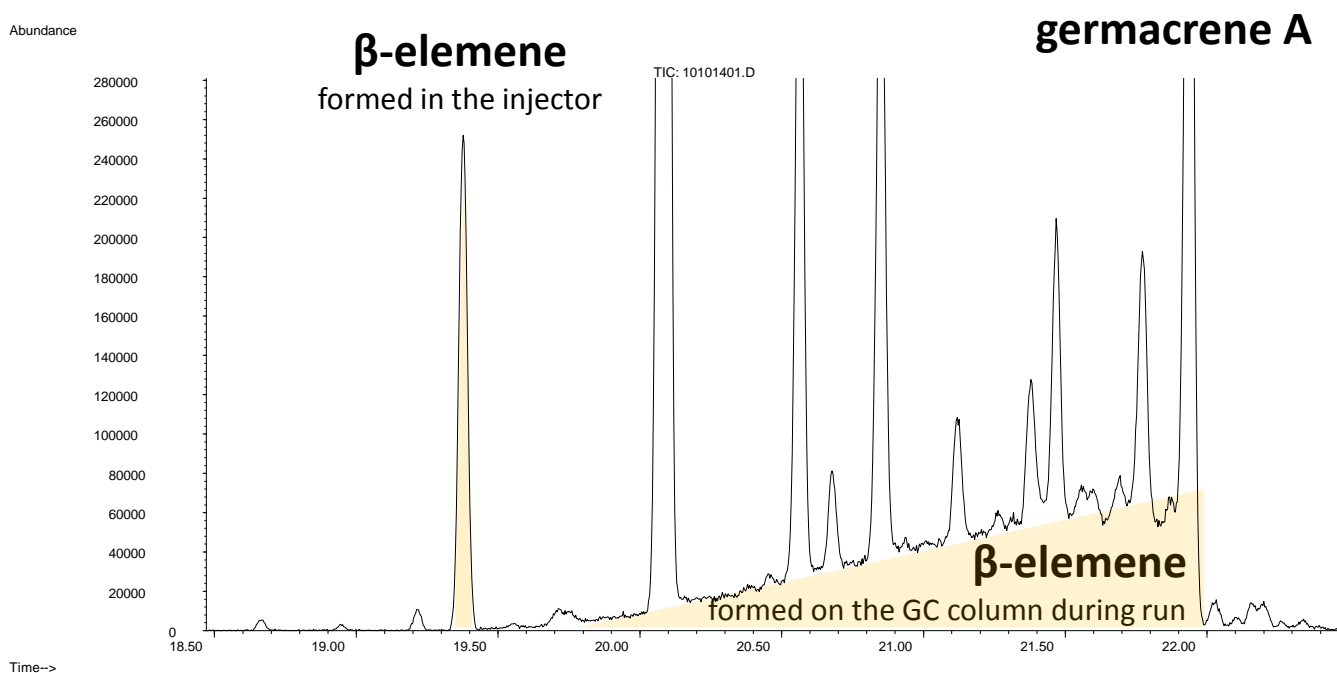

**Additional file 5.** Chemical conversion of the sesquiterpene germacrene A to  $\beta$ -elemene at a low GC injector temperature. When the injector temperature was set at 150°C, the heat-induced rearrangement of germacrene A to  $\beta$ -elemene occurs not only in the hot GC injector before the GC run but also during the GC run due to the increasing oven temperature. While  $\beta$ -elemene formed in the injector will give a sharp peak in the chromatogram,  $\beta$ -elemene formed during the GC run is visible as a ramp which increases with the retention time and stops exactly with the germacrene A peak. Thus the sum of the peak areas of germacrene A and  $\beta$ -elemene obtained with an injector temperature of 150°C will not be the same as the peak area of  $\beta$ -elemene obtained with an injector temperature of 250°C.
