# Supplementary material for: Positive Darwinian selection is a driving force for the diversification of terpenoid biosynthesis in the genus Oryza
Source: PubMed Central journal article supplement (PMC4172859; doi:10.1186/s12870-014-0239-x), 2014-09-16
Supplement: 12870_2014_239_MOESM6_ESM.pdf [file 12870_2014_239_MOESM6_ESM.pdf]

## Additional file 6. Molecular evolutionary analysis of OryzaTPS1 using the species tree

| Model                     | Parameters estimated                    | LnL                   | Significant? | Positively selected sites <sup>a</sup>                                                      |
|---------------------------|-----------------------------------------|-----------------------|--------------|---------------------------------------------------------------------------------------------|
| <b>Branch models</b>      |                                         |                       |              |                                                                                             |
| 1 $\omega$                | $\omega_0=0.6397$                       | -2831.9384            |              |                                                                                             |
| 2 $\omega_D$              | $\omega_0=0.5732$ ; $\omega_D=999.0000$ | -2829.4825            | Yes (P<0.05) |                                                                                             |
| <b>Branch-site models</b> |                                         |                       |              |                                                                                             |
| Null (M1a)                | $\omega_0=0$ ; $\omega_1=1$             | -2822.1200            |              |                                                                                             |
| Null (neutral)            | Site class                              | 0 1 2a 2b             | -2822.1200   |                                                                                             |
|                           | $\omega_B^b$                            | 0 1 0 1               |              |                                                                                             |
| Positive selection        | $\omega_A$                              | 0 1 0.4000 0.4000     |              |                                                                                             |
|                           | Site class                              | 0 1 2a 2b             | -2819.2042   | Yes (vs neutral)<br>(P<0.05)                                                                |
|                           | $\omega_B^b$                            | 0 1 0 1               |              | <b>32R (0.977*)</b><br><b>318L (0.976*)</b><br><b>429G (0.978*)</b><br><b>433I (0.955*)</b> |
|                           | $\omega_A$                              | 0 1 753.2913 753.2913 |              | <b>486P (0.977*)</b>                                                                        |

- <sup>a</sup> the amino acids and their positions refer to those of OrTPS1M.

- <sup>b</sup> for Background,  $\omega_A$  for foreground(OrTPS1M);

- \*denotes posterior probabilities by Bayes Empirical Bayes analysis.
