# Supplementary material for: Positive Darwinian selection is a driving force for the diversification of terpenoid biosynthesis in the genus Oryza
Source: PubMed Central journal article supplement (PMC4172859; doi:10.1186/s12870-014-0239-x), 2014-09-16
Supplement: 12870_2014_239_MOESM7_ESM.pdf [file 12870_2014_239_MOESM7_ESM.pdf]

**Additional file 7. Relative abundance of individual products of *Oryza*TPS1 emitted from insect-damaged rice plants.**

| Species                | Enzymes  | Germacrene D    | $\beta$ -elemene | ( <i>E</i> )- $\beta$ -caryophyllene | $\alpha$ -humulene |
|------------------------|----------|-----------------|------------------|--------------------------------------|--------------------|
| <i>O. sativa</i>       | OsTPS1   | ND <sup>b</sup> | 40.1 $\pm$ 0.6   | 55.4 $\pm$ 0.3                       | 4.5 $\pm$ 0.2      |
| <i>O. officinalis</i>  | OoTPS1   | ND              | 40.7 $\pm$ 0.6   | 59.3 $\pm$ 0.9                       | ND                 |
| <i>O. glaberrima</i>   | OgTPS1   | ND              | 43.9 $\pm$ 0.5   | 50.1 $\pm$ 0.9                       | 6.0 $\pm$ 0.5      |
| <i>O. barthii</i>      | ObTPS1   | ND              | 2.5 $\pm$ 0.1    | 95.0 $\pm$ 0.2                       | 2.5 $\pm$ 0.1      |
| <i>O. nivara</i>       | OnTPS1   | 3.6 $\pm$ 0.1   | 2.8 $\pm$ 0.1    | 80.7 $\pm$ 0.3                       | 12.9 $\pm$ 0.1     |
| <i>O. glumaepatula</i> | OgluTPS1 | ND              | ND               | 100                                  | ND                 |
| <i>O. ruffipogon</i>   | OrTPS1   | 75.4 $\pm$ 0.5  | 24.6 $\pm$ 0.6   | ND                                   | ND                 |

<sup>a</sup> The total emission of the four sesquiterpenes for each accession is set as 100%.

<sup>b</sup> ND: not detected.
