# Supplementary material for: Positive Darwinian selection is a driving force for the diversification of terpenoid biosynthesis in the genus Oryza
Source: PubMed Central journal article supplement (PMC4172859; doi:10.1186/s12870-014-0239-x), 2014-09-16
Supplement: 12870_2014_239_MOESM8_ESM.pdf [file 12870_2014_239_MOESM8_ESM.pdf]

**Additional file 8. The top five paralogs of Os08g04500 by blast search against the rice genome database with the amino acid sequence of Os08g04500 as query.**

| Locus          | Description               | Top identity |
|----------------|---------------------------|--------------|
| LOC_Os08g04500 | terpene synthase          | 100%         |
| LOC_Os08g07100 | terpene synthase          | 50.28%       |
| LOC_Os08g07120 | putative terpene synthase | 45.48%       |
| LOC_Os08g07080 | putative terpene synthase | 45.33%       |
| LOC_Os01g23530 | putative terpene synthase | 43.12%       |
| LOC_Os03g24760 | putative terpene synthase | 40.94%       |
